# Supplementary material for: Rapid analysis of differential chemical compositions of Poria cocos using thin-layer chromatography spray ionization-mass spectrometry
Source: Royal Society of Chemistry journal article supplement (doi:10.1039/d2an00565d), 2022-01-01
Supplement: d2an00565d1.pdf [file d2an00565d1.pdf]

# Supplementary material

## **Rapid Analysis for Differential Chemical Compositions of *Poria cocos* by Using Thin-Layer Chromatography Spray Ionization-Mass Spectrometry**

Ying Yang <sup>1</sup>, Linnan Li <sup>1,\*</sup>, Na Li <sup>1</sup>, Fan Li <sup>1</sup>, Wenxiang Fan<sup>1</sup>, Yitian He <sup>1</sup>, Zhengtao

Wang <sup>1,2,\*</sup>, Li Yang <sup>1,2,\*</sup>

1. The MOE Key Laboratory of Standardization of Chinese Medicines, The SATCM Key Laboratory of New Resources and Quality Evaluation of Chinese Medicines, The Shanghai Key Laboratory for Compound Chinese Medicines, Institute of Chinese Materia Medica, Shanghai University of Traditional Chinese Medicine, Shanghai 201203, China

2. Shanghai R&D Center for Standardization of Chinese Medicines, Shanghai 201203, China

Corresponding author:

Prof. Linnan Li, E-mail: linnanli@shutcm.edu.cn;

Prof. Li Yang, E-mail: yl7@shutcm.edu.cn;

Prof. Zhengtao Wang, E-mail: ztwang@shutcm.edu.cn

## **Experimental**

### **Comparison of TLCSI-MS and HPLC-MS methods**

The *Poria cocos*-22 was selected and the samples were firstly analyzed using thin-layer chromatography. The spot areas on the TLC plates were then analyzed using TLCSI-MS and HPLC-MS, respectively. As shown in Fig. S14, the results of TLCSI-MS and HPLC-MS were generally consistent. In addition, to exclude background interference, the blank TLC plate was tested before the experiments (Fig. S15).

### **Stability experiments of TLCSI-MS method**

The same test solution (*Poria cocos*-22) was precisely aspirated at 0 h, 2 h, 4 h, 6 h, 12 h, 24 h and 36 h for determination. Poria acid and dehydrococcodylic acid were used as an indicator component, and the results of pachymic acid content with RSD (n=3) of 1.80%, depachymic acid content with RSD (n=3) of 1.87% were obtained. This indicated that the stability of the method is good (Table S3).

### **UPLC-Q-TOF-MS analysis**

Chromatographic separation was performed on a Waters ACQUITY UPLC™ system (Waters, Milford, MA, USA), equipped with a binary solvent delivery system and an auto-sampler. An ACQUITY UPLC® BEHC18 chromatographic column (2.1 mm×100 mm, 1.7 μm, Waters) was used for separation at 30°C. The mobile phase consisted of (A) acetonitrile and (B) 0.1% formic acid aqueous solution. A gradient elution program was set as follows: 0-15 min 10%-95% A, 15-18 min 10% A. The flow

rate was set at  $0.3 \text{ mL} \cdot \text{min}^{-1}$  and the injection volume of the sample was  $5 \text{ } \mu\text{L}$ . The temperature of the auto-sampler was maintained at  $10^{\circ}\text{C}$ .

UPLC<sup>TM</sup>-QTOF Synapt G2 HDMS (Waters, Milford, MA, USA) equipped with an electrospray ionization source and Micromass ZQ 2000 single quadrupole detector was detected. The mass spectrometer was employed at negative ion mode and operated over a range of  $m/z$  100 to 1500, and nitrogen was used as nebulization and desolvation gas. The desolvation gas flow rate was  $600 \text{ L} \cdot \text{h}^{-1}$  at the temperature of  $350^{\circ}\text{C}$ . The source temperature was held at  $120^{\circ}\text{C}$ . The capillary voltage and cone voltage were set at 2.8 kV and 55 V, respectively. The cone gas flow was set at  $50 \text{ L} \cdot \text{h}^{-1}$  and detection mode was MSE mode.

## Supplementary figures

Fig. S1 TLCSI-MS spectra of alkaloids.

Fig. S2 TLCSI-MS spectra of triterpene acids.

Fig. S3 TLCSI-MS spectra of anthraquinones and volatile oils.

Fig. S4 TLCSI-MS spectra of amino acids and bile acids.

Fig. S5 TLCSI-MS spectra of phenolic acids, phenylpropanoids, triterpenoid saponins, and flavonoids.

Fig. S6 The effect of gas heater temperature on the ionization efficiency of pachymic acid.

Fig. S7 The effect of ion source distance on the ionization efficiency of pachymic acid.

Fig. S8 The effect of triangle size on the ionization efficiency of pachymic acid.

Fig. S9 The effect of eluent volume on the ionization efficiency of pachymic acid.

Fig. S10 The interference effect of different eluent solvents.

Fig. S11 PCA analysis of *Poria cocos*.

Fig. S12 PLS-DA/Loading Plot based on the holistic chemical profiling of four parts from 20 *Poria cocos* samples.

Fig. S13 Correlation analysis diagram of TLCSI-MS and HPLC-MS methods.

Fig. S14 TLC profile, TLCSI-MS and HPLC-MS spectra of *Poria cocos*.

Fig. S15 Mass spectra of blank backgrounds for TLCSI-MS and HPLC-MS.

## **Supplementary tables**

Table S1 Information of 20 batches of *Poria cocos*.

Table S2 Information table of *Poria cocos* preparations.

Table S3 Results of stability test measurements.

Table S4 Chemical characterization of triterpene compounds in PC, RP, WP and PRP by TLCSI-MS/MS.

Table S5 Recovery of triterpene acids in different *Poria cocos* preparations by TLCSI-MS in negative-ion mode.

Table S6 Comparison of TLCSI-MS and HPLC-MS method for analysis of two triterpene acids in different batches of *Poria cocos* samples.

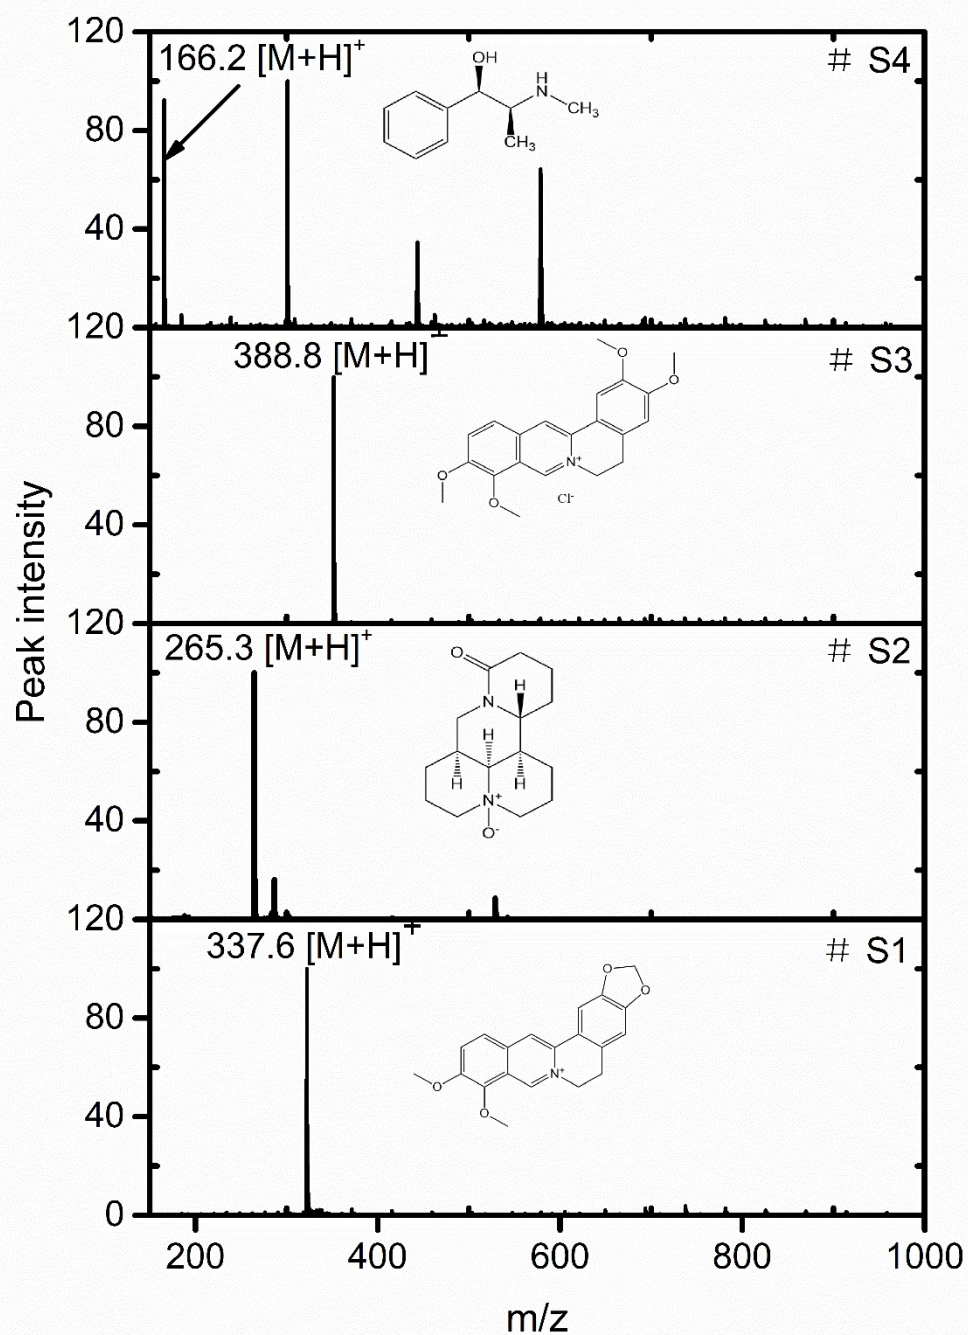

Fig. S1 TLC-MS spectra of alkaloids: berberine (S1), oxymatrine (S2), palmatine chloride (S3), and ephedrine (S4).

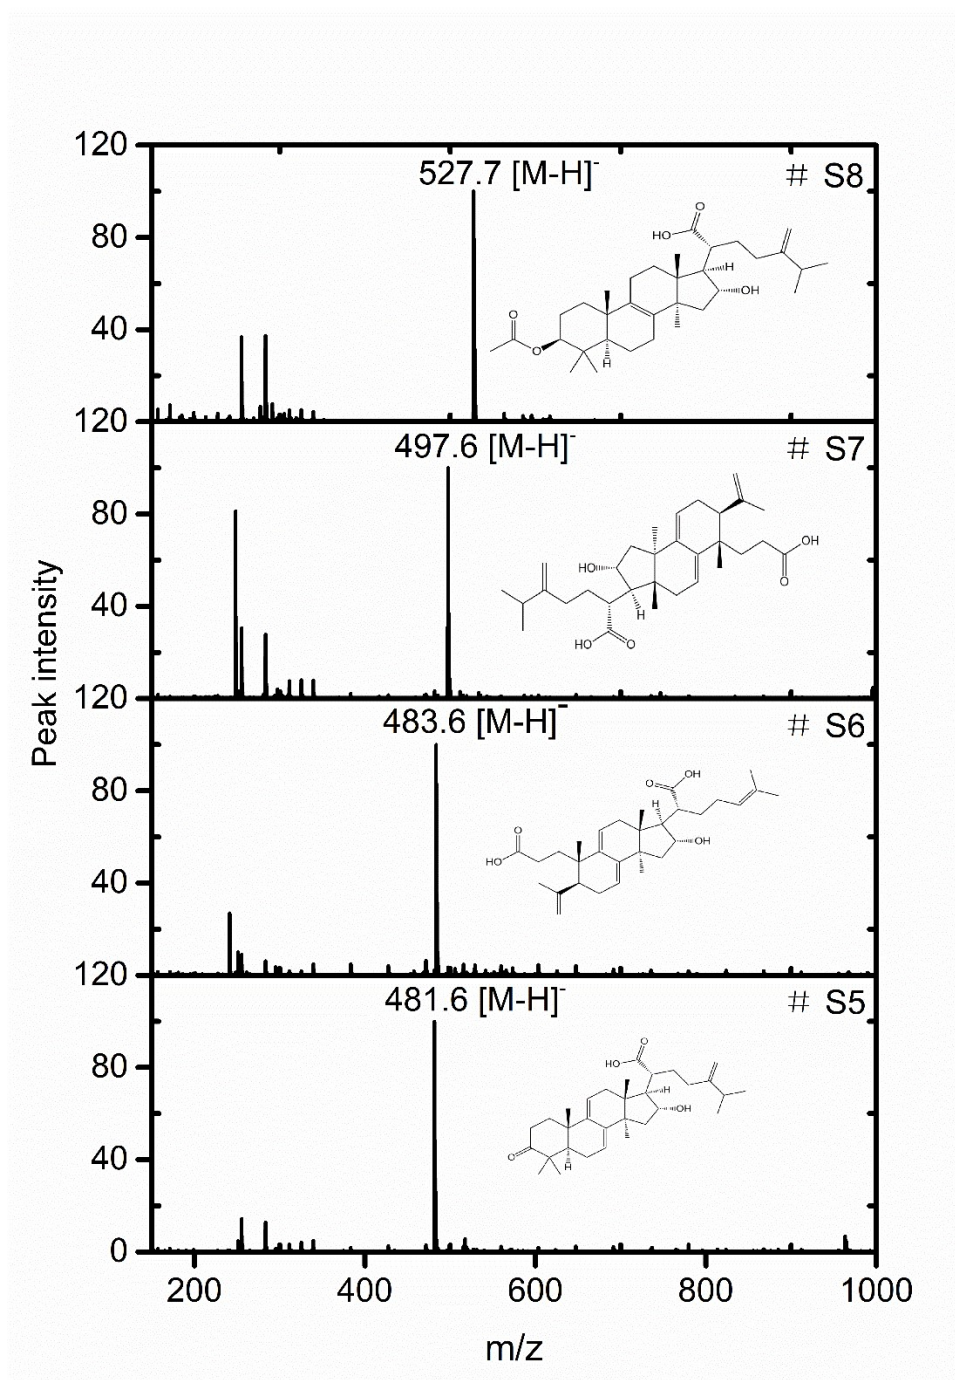

Fig. S2 TLC-MS spectra of triterpene acids: polyporenic acid C (S5), poricoic acid B (S6), poricoic acid A (S7), and pachymic acid (S4).

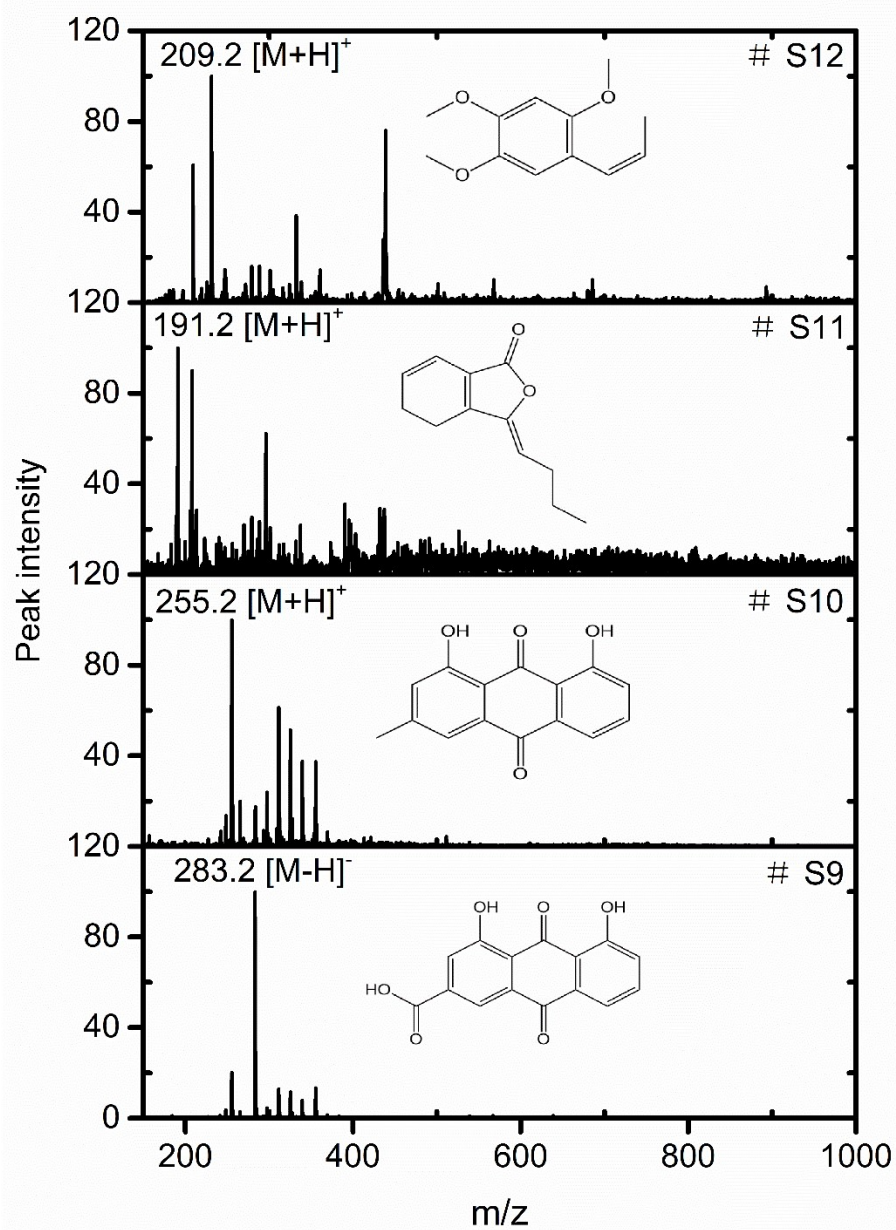

Fig. S3 TLC-ESI-MS spectra of anthraquinones and volatile oils: rhein (S9), chrysophanol (S10), ligustilide (S11), and  $\beta$ -asarone (S12).

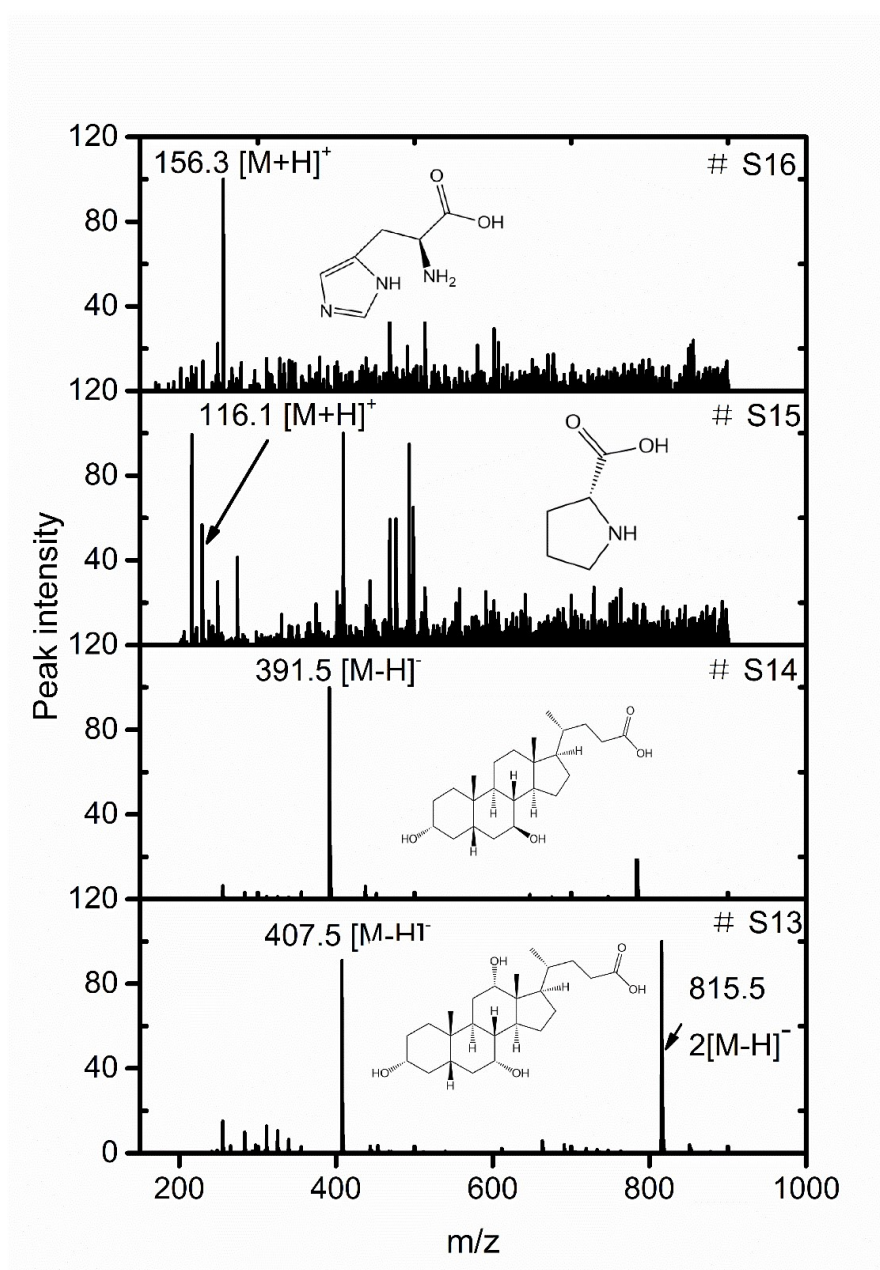

Fig. S4 TLCSI-MS spectra of amino acids and bile acids: cholic acid (S13), ursodeoxycholic acid (S14), proline (S15), and histidine (S16).

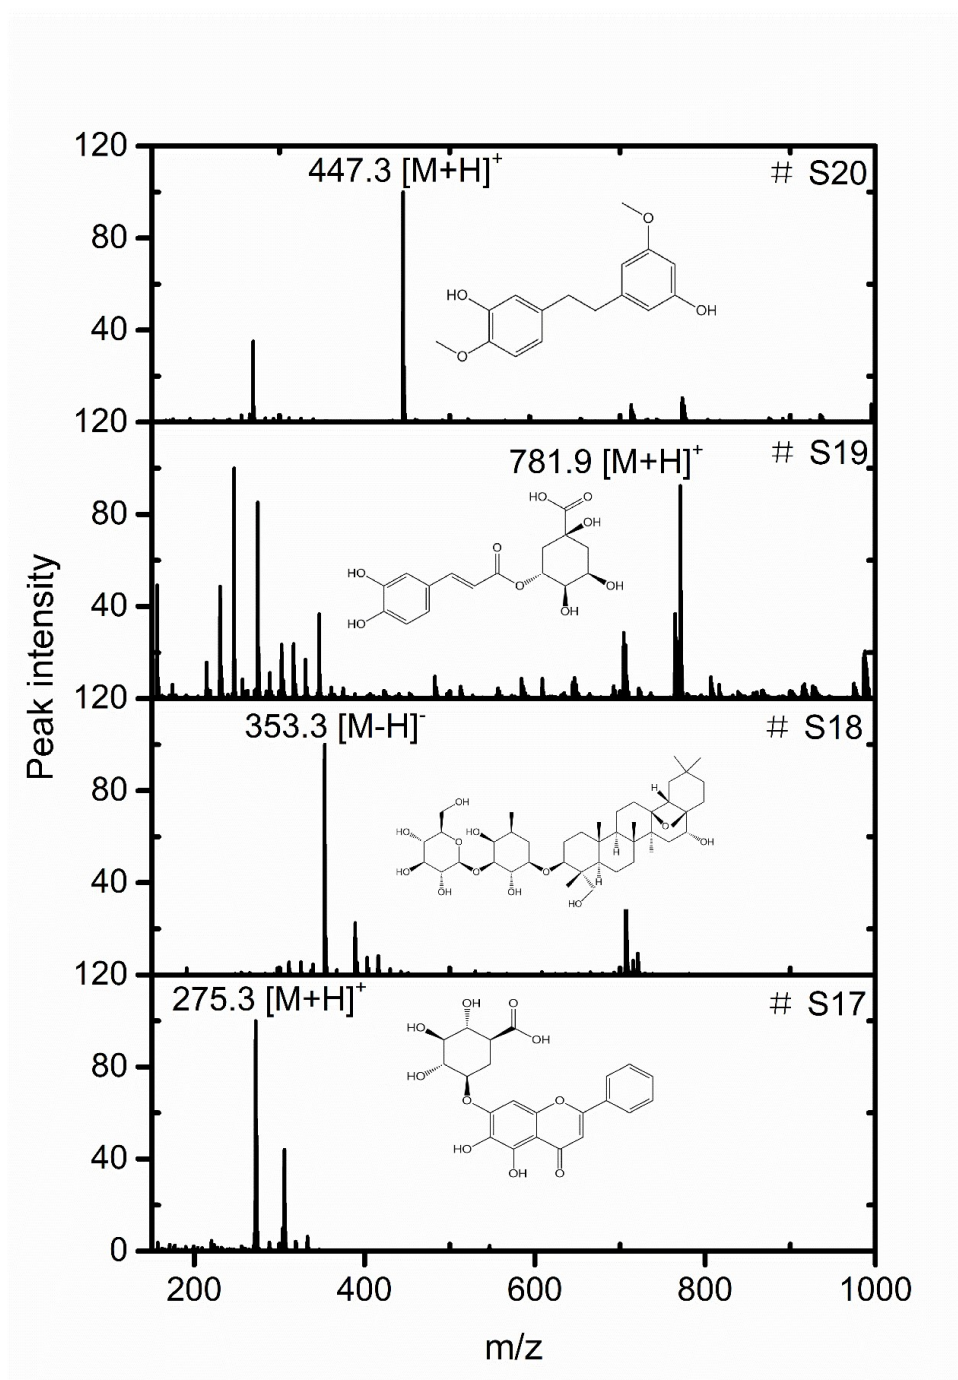

Fig. S5 TLC-ESI-MS spectra of phenolic acids, phenylpropanoids, triterpenoid saponins, and flavonoids: gigantol (S17), chlorogenic acid (S18), saikosaponin D (S19), and baicalin (S20).

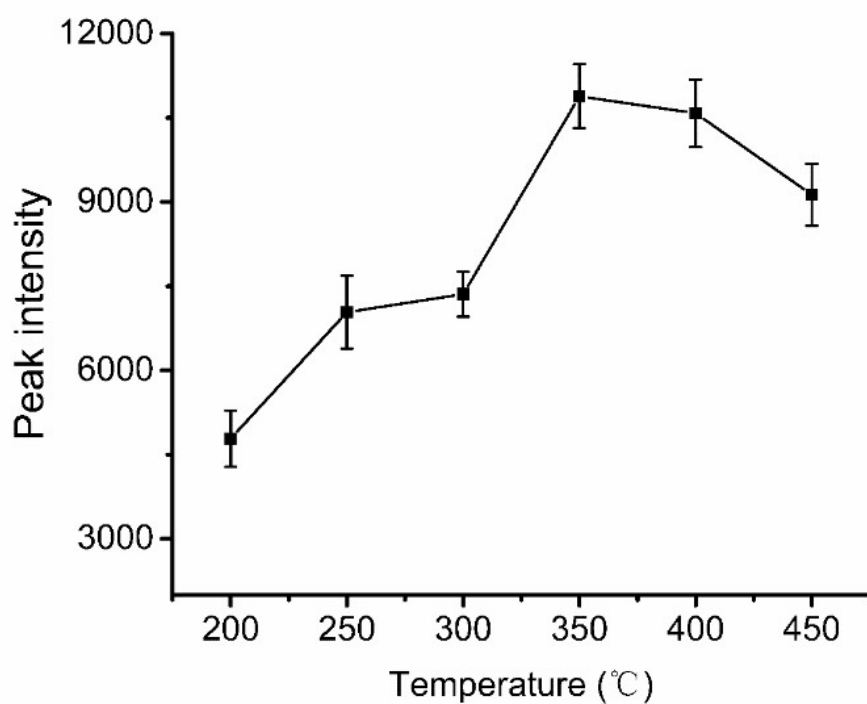

Fig. S6 The effect of gas heater temperature on the ionization efficiency of pachymic acid.

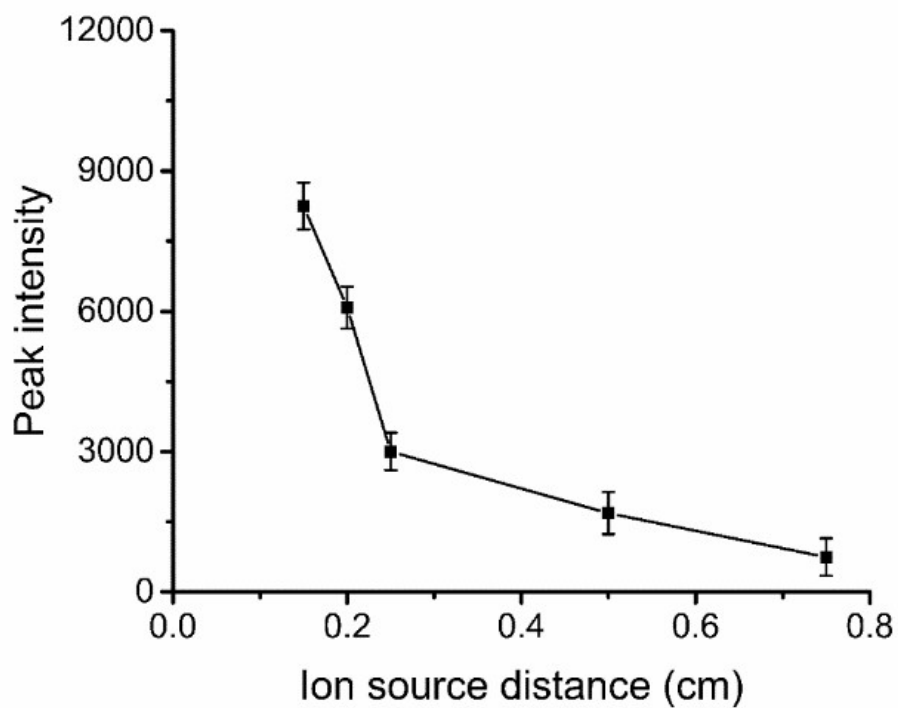

Fig. S7 The effect of ion source distance on the ionization efficiency of pachymic acid.

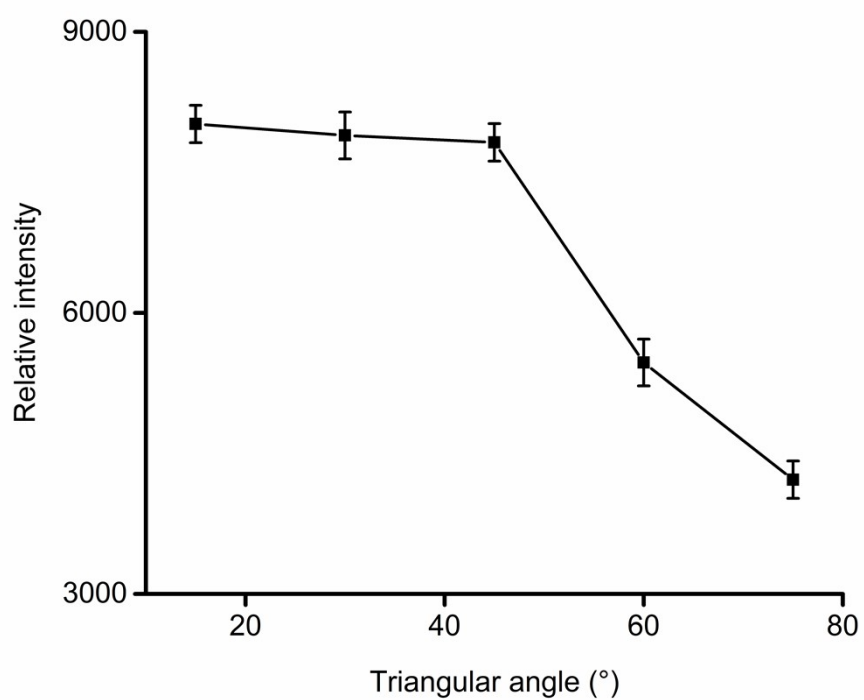

Fig. S8 The effect of triangular angle on the ionization efficiency of pachymic acid.

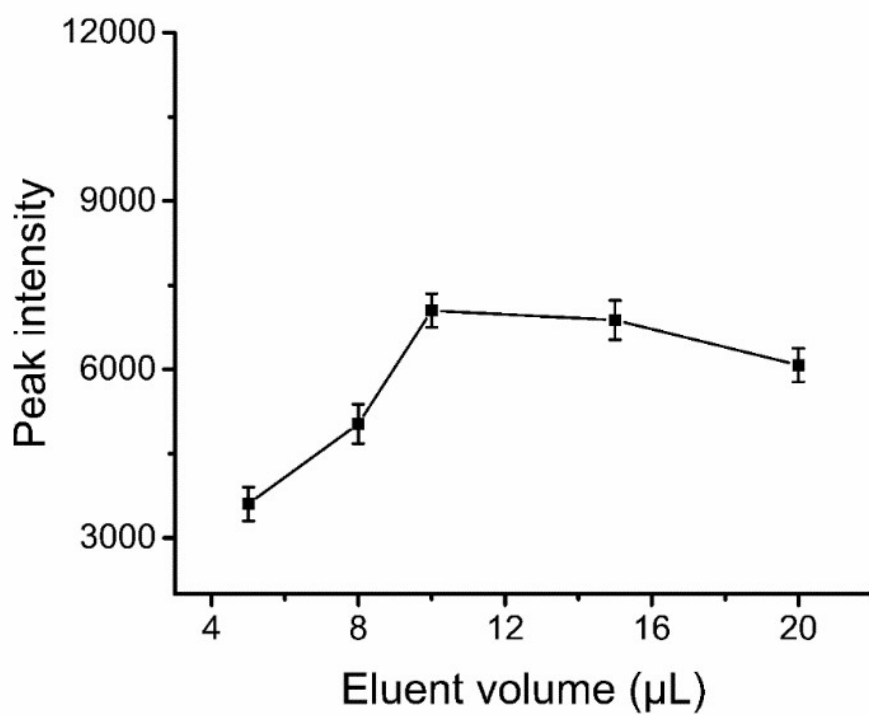

Fig. S9 The effect of eluent volume on the ionization efficiency of pachymic acid.

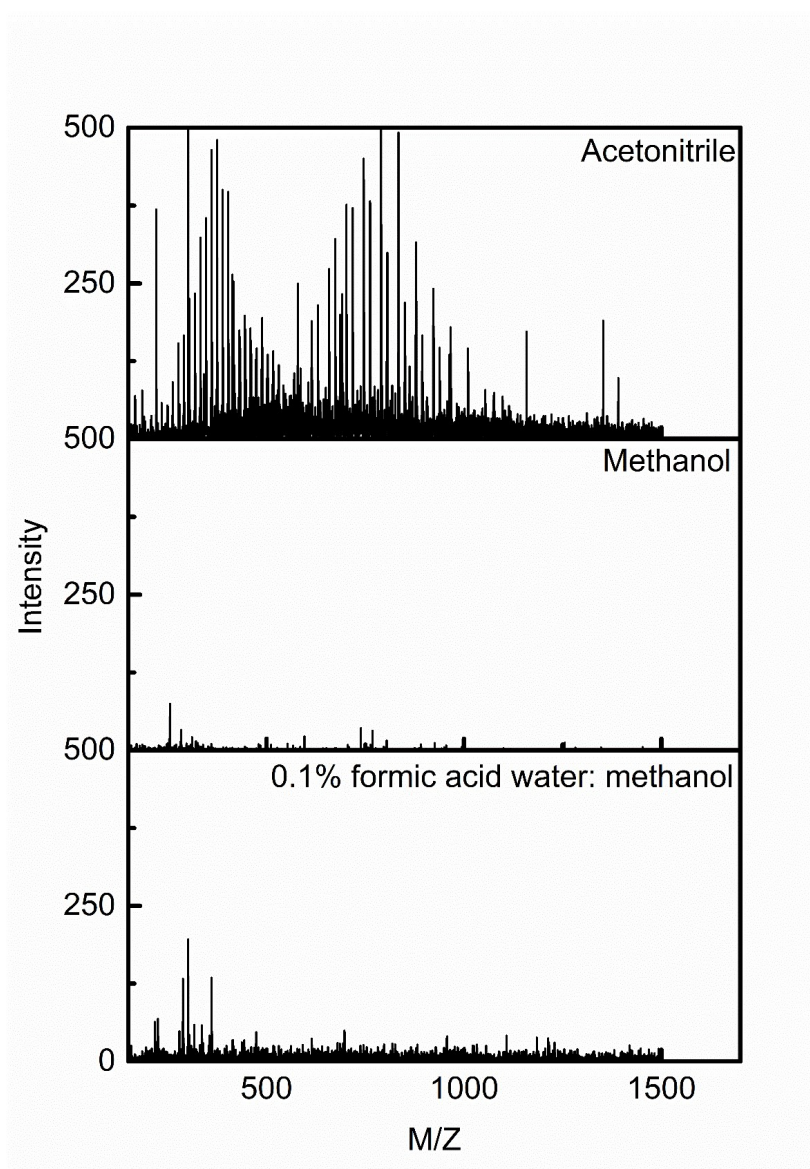

Fig. S10 The interference effect of different eluent solvents.

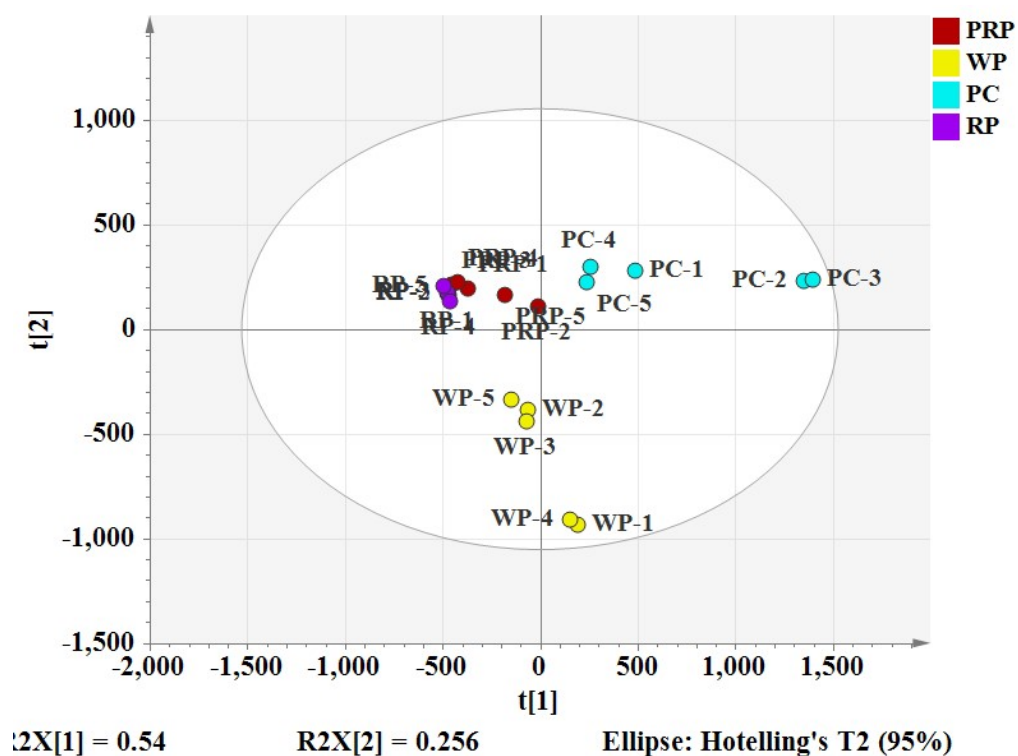

Fig. S11 PCA analysis of *Poria cocos*: White Poria (WP), Poriae Cutis (PC), Poria cum Radix Pini (PRP), and Rubra Poria (RP).

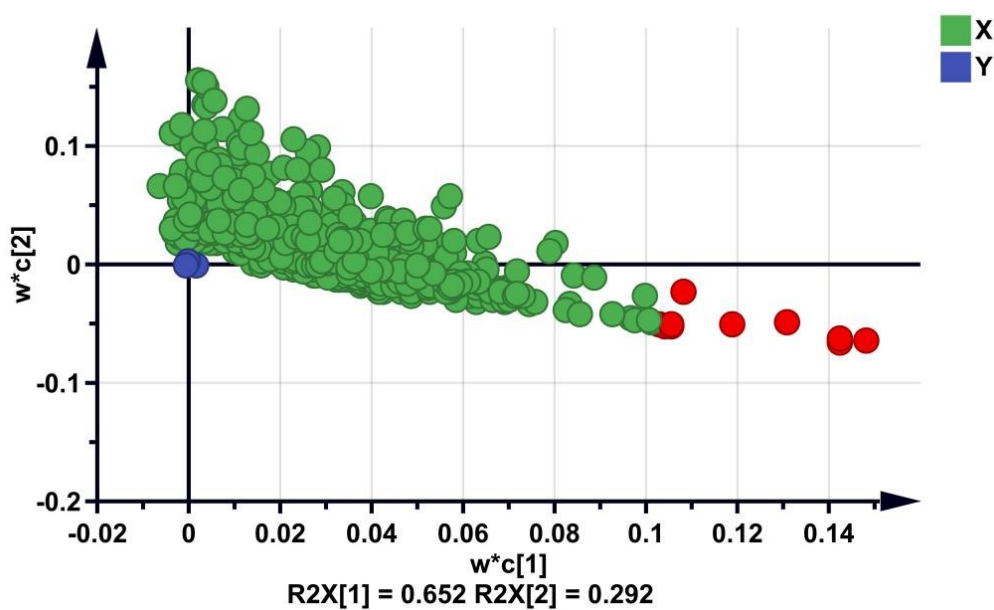

Fig. S12 PLS-DA/Loading Plot based on the holistic chemical profiling of four parts from 20 *Poria cocos* samples.

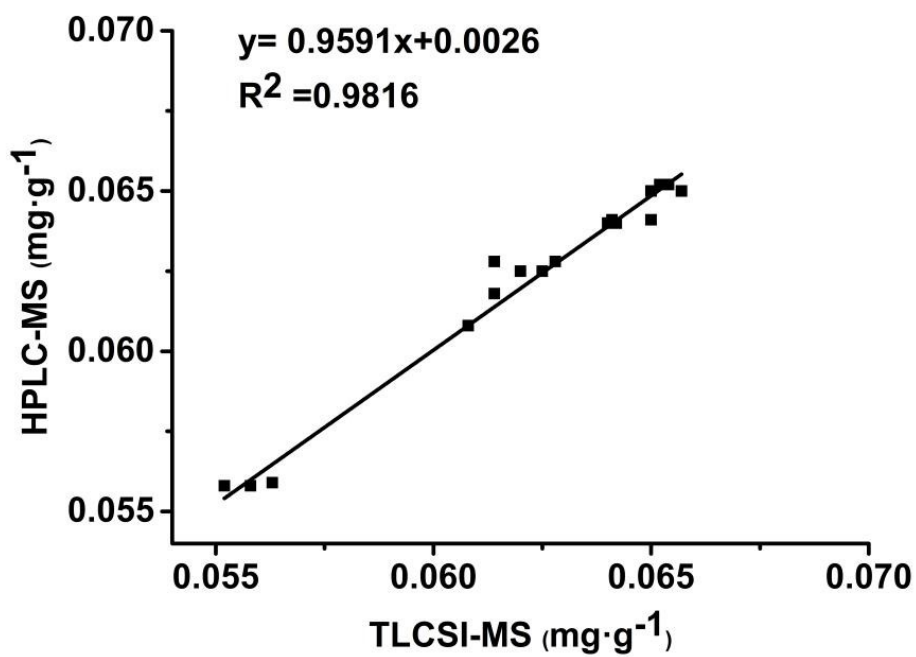

Fig. S13 Correlation analysis diagram of TLCSI-MS and HPLC-MS methods.

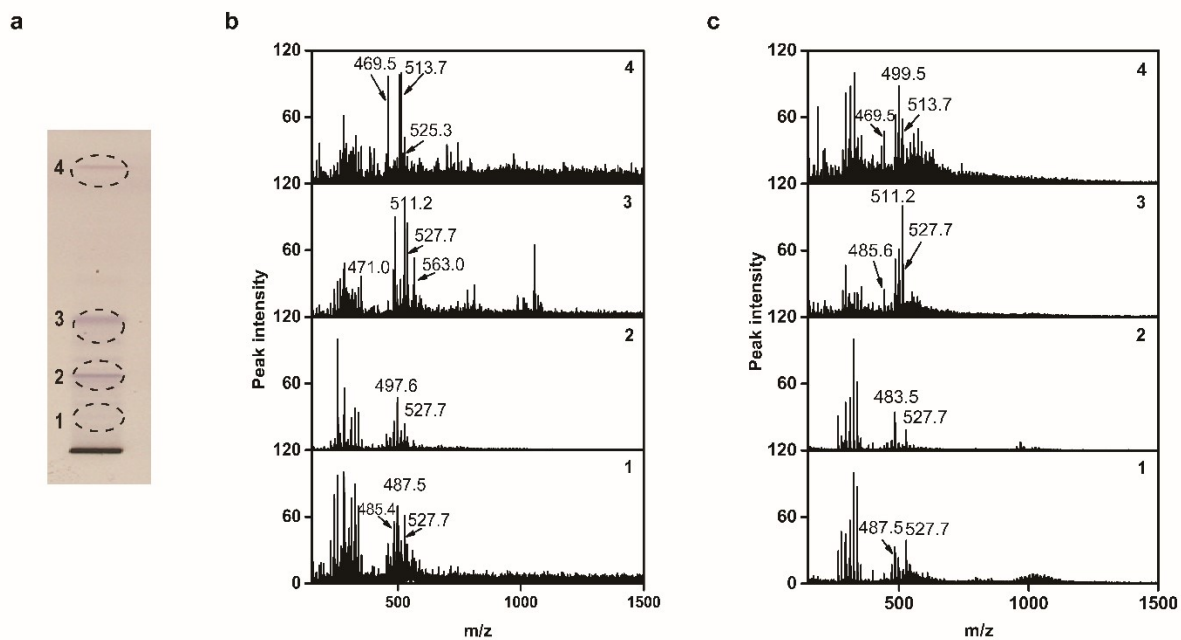

Fig. S14 TLC profile (a), TLCSI-MS (b) and HPLC-MS spectra (c) of *Poria cocos*.

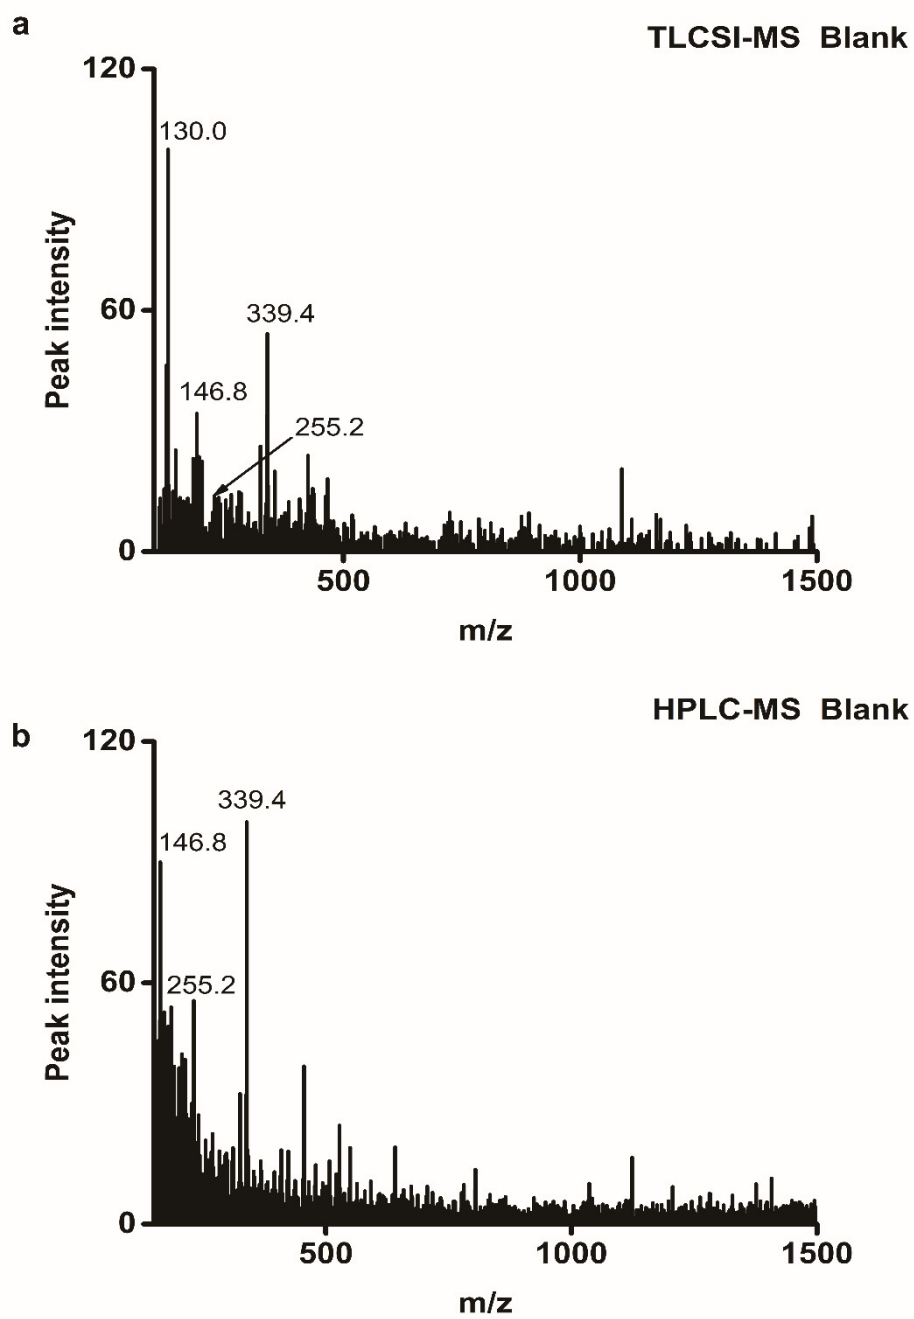

Fig. S15 Mass spectra of blank backgrounds for TLCSI-MS (a) and HPLC-MS (b).

Table S1 Information of 20 batches of *Poria cocos*.

| No.       | Sample               | Locality         | Producer                                                                  |
|-----------|----------------------|------------------|---------------------------------------------------------------------------|
| <b>1</b>  | Poria cum Radix Pini | Yingshan, Hubei  | Huanggang Jingui Chinese<br>Medicine Industry Development<br>Co., Ltd.    |
| <b>2</b>  | Poria cum Radix Pini | Yingshan, Hubei  |                                                                           |
| <b>3</b>  | Poria cum Radix Pini | Yingshan, Hubei  |                                                                           |
| <b>4</b>  | Poria cum Radix Pini | Yingshan, Hubei  |                                                                           |
| <b>5</b>  | Poria cum Radix Pini | Jinzhai, Anhu    |                                                                           |
| <b>6</b>  | Poriae Cutis         | Yingshan, Hubei  |                                                                           |
| <b>7</b>  | Poriae Cutis         | Yingshan, Hubei  |                                                                           |
| <b>8</b>  | Poriae Cutis         | Yingshan, Hubei  |                                                                           |
| <b>9</b>  | Poriae Cutis         | Yingshan, Hubei  | Treasure source Chinese herbal<br>medicine flower tea shop                |
| <b>10</b> | Poriae Cutis         | Yingshan, Hubei  | Shangyuantang Pharmacy<br>Flagship Store                                  |
| <b>11</b> | Rubra Poria          | Anqing, Anhui    | Anhui Dechang Pharmaceutical<br>Co., Ltd.                                 |
| <b>12</b> | Rubra Poria          | Anqing, Anhui    |                                                                           |
| <b>13</b> | Rubra Poria          | Anqing, Anhui    |                                                                           |
| <b>14</b> | Rubra Poria          | Anqing, Anhui    |                                                                           |
| <b>15</b> | Rubra Poria          | Anqing, Anhui    |                                                                           |
| <b>16</b> | White Poria          | Laibang, Yuexi   | Yuexi County Linyuan<br>Agricultural and Sideline<br>Products Cooperative |
| <b>17</b> | White Poria          | Jingdong, Yunnan | Anhui Shanlihuo Agriculture Co.,<br>Ltd.                                  |
| <b>18</b> | White Poria          | Jingdong, Yunnan | Yuexi County Linyuan<br>Agricultural and Sideline<br>Products Cooperative |
| <b>19</b> | White Poria          | Jingdong, Yunnan |                                                                           |
| <b>20</b> | White Poria          | Luotian, Hubei   |                                                                           |

Table S2 Information table of *Poria cocos* preparations.

| No. | Sample | Compounds                                                                                                         | Producer                                          |
|-----|--------|-------------------------------------------------------------------------------------------------------------------|---------------------------------------------------|
| 1   | LDC-1  | Poria, Rehmanniae Radix Praeparata,<br>Moutan Cortex, Kaempferiae<br>Rhizome, Corni Fructus, Alismatis<br>Rhizome | Amendment to<br>Pharmaceutical Group<br>Co., Ltd  |
| 2   | LDC-2  | Poria, Rehmanniae Radix Praeparata,<br>Moutan Cortex, Kaempferiae<br>Rhizome, Corni Fructus, Alismatis<br>Rhizome | Amendment to<br>Pharmaceutical Group<br>Co., Ltd  |
| 3   | LDG    | Poria, Rehmanniae Radix Praeparata,<br>Moutan Cortex, Kaempferiae<br>Rhizome, Corni Fructus, Alismatis<br>Rhizome | Baohetang (Jiaozuo)<br>Pharmaceutical Co.,<br>Ltd |
| 4   | GFC    | Poria, Moutan Cortex, Cinnamomi<br>Ramulus, Paeoniae Radix Alba                                                   | Jiangsu Kang Yuan<br>Pharmaceutical Co.,<br>Ltd.  |

Table S3 Results of stability test measurements.

| Time (h) | Depachymic acid (mg·g <sup>-1</sup> ) | Pachymic acid (mg·g <sup>-1</sup> ) |
|----------|---------------------------------------|-------------------------------------|
| 0        | 0.25                                  | 0.42                                |
| 2        | 0.25                                  | 0.42                                |
| 4        | 0.25                                  | 0.43                                |
| 6        | 0.24                                  | 0.41                                |
| 8        | 0.25                                  | 0.42                                |
| 12       | 0.24                                  | 0.41                                |
| 24       | 0.25                                  | 0.43                                |
| 36       | 0.25                                  | 0.42                                |
| RSD (%)  | 1.87                                  | 1.80                                |

Table S4 Chemical characterization of triterpene compounds in PC, RP, WP and PRP  
by TLCSI-MS/MS.

| Identified compounds                                                 | [M-H] <sup>-</sup> (m/z) | MS/MS                             |
|----------------------------------------------------------------------|--------------------------|-----------------------------------|
| 3 $\beta$ ,5 $\alpha$ ,9 $\alpha$ -Trihydroxyergosta-7,22-dien-6-one | 443.5                    | 327.2, 369.3, 407.2, 281.1        |
| 16 $\alpha$ -Hydroxy-lanosta-7,9(11),24-trien-21-oic acid            | 453.3                    | 239.0, 324.3, 371.2, 435.5        |
| Dehydrotrametenolic acid                                             | 453.6                    | 324.3, 337.2, 435.5, 438.7        |
| 3-Hydrocortisonic acid                                               | 453.6                    | 324.3, 337.2, 435.5, 438.7        |
| Dehydrotrametenolic acid                                             | 455.7                    | 437.3, 295.2                      |
| 3-Oxo-16-hydroxylanosta-7,9(11),24-trien-21-oic acid                 | 467.7                    | 325.2, 399.3                      |
| Dehydroeburiconic acid                                               | 467.7                    | 311.2, 449.3                      |
| 16 $\alpha$ -Hydroxytrametenolic acid                                | 471.3                    | 339.0, 397.3, 415.4, 427.4        |
| Pachymenin C                                                         | 479.3                    | 311.2, 405.2                      |
| Polyporenic acid C                                                   | 481.3                    | 335.0, 388.4, 403.4, 419.5, 435.5 |
| Poricoic acid B                                                      | 483.6                    | 313.3, 337.2, 405.3, 439.4, 471.3 |
| Dehydrotumulosic acid                                                | 483.3                    | 337.4, 367.4, 411.4, 465.3        |
| Poriacosone A                                                        | 485.3                    | 441.4, 467.5, 470.0               |
| Tumulosic acid                                                       | 485.3                    | 339.3, 387.4, 441.4               |
| Poriacosone B                                                        | 485.3                    | 339.3, 423.4, 325.2               |
| 16 $\alpha$ -Acetoxy-lanosta-7,9(11),24-dien-21-oic acid             | 495.3                    | 435.3, 293.1                      |
| Poricoic acid A                                                      | 497.6                    | 323.0, 382.4, 424.3, 480.3        |
| 6 $\alpha$ -Hydroxy-polyporenic acid C                               | 497.7                    | 341.0, 381.3, 423.4               |
| 16 $\alpha$ , 25-Dihydroxyeburiconic acid                            | 499.5                    | 311.3, 401.3,                     |

|                                                                               |       |                                          |
|-------------------------------------------------------------------------------|-------|------------------------------------------|
| 16 $\alpha$ , 29-dihydroxyeburiconic acid                                     | 499.5 | 369.1, 383.3, 481.5                      |
| 3-O-acetyldehydroeburicoic acid                                               | 509.3 | 449.3, 353.2, 293.2                      |
| Pachymenin AM                                                                 | 511.7 | 325.1, 351.3, 369.3, 413.4, 467.4, 481.3 |
| Pachymenin D                                                                  | 513.3 | 379.3, 421.4, 437.4, 495.2               |
| 3-O-acetyl-16 $\alpha$ -hydroxytrametenolic acid                              | 513.3 | 379.3, 425.4, 441.4, 495.4               |
| 5,8 $\alpha$ -Dioxy-3 $\beta$ ,16-dihydroxyl-lanost-7(11),24-dien-21-oic acid | 515.3 | 383.4, 405.3, 421.4                      |
| Poricoic acid D                                                               | 515.3 | 383.4, 439.4                             |
| Poricoic acid M                                                               | 517.6 | 423.4, 441.5, 409.4, 355.3               |
| Dehydropachymic acid                                                          | 525.3 | 463.3                                    |
| Pachymic acid                                                                 | 527.7 | 399.3, 411.4, 429.4, 467.5               |
| 25-Methoxyporicoic acid A                                                     | 527.5 | 399.3, 467.5, 509.5                      |
| 3 $\beta$ -Acetyloxy-16 $\alpha$ -hydroxy-24-oxolanost-8-en-21-oic acid       | 529.3 | 397.5, 413.3, 469.3, 511.5               |
| 6 $\alpha$ -Hydroxydehydropachymic acid                                       | 541.3 | 403.3, 421.5, 437.4, 497.5               |

Table S5 Recovery of triterpene acids in different *Poria cocos* preparations by

TLCSI-MS in negative-ion mode.

| Samples | Compounds             | Background<br>concentration<br>(ng·mL <sup>-1</sup> ) | Spiked<br>concentration<br>(ng·mL <sup>-1</sup> ) | Concentration<br>(ng·mL <sup>-1</sup> ) | Recovery<br>(%) | RSD (%)<br>(n=3) |
|---------|-----------------------|-------------------------------------------------------|---------------------------------------------------|-----------------------------------------|-----------------|------------------|
| LDC-1   | pachymic<br>acid      | 30.5                                                  | 0                                                 | -                                       | -               | -                |
|         |                       |                                                       | 25                                                | 30.1                                    | 85.8            | 2.3              |
|         |                       |                                                       | 50                                                | 81.1                                    | 81.0            | 0.5              |
|         |                       |                                                       | 75                                                | 101.4                                   | 85.3            | 2.5              |
|         | poricoic<br>acid B    | 24.8                                                  | 0                                                 | -                                       | -               | -                |
|         |                       |                                                       | 10                                                | 25.7                                    | 92.4            | 5.3              |
|         |                       |                                                       | 20                                                | 48.9                                    | 93.4            | 2.7              |
|         |                       |                                                       | 30                                                | 90.7                                    | 99.1            | 3.0              |
|         | polyporenic<br>acid C | 11.6                                                  | 0                                                 | -                                       | -               | -                |
|         |                       |                                                       | 10                                                | 18.5                                    | 88.3            | 1.8              |
|         |                       |                                                       | 20                                                | 30.5                                    | 95.3            | 1.4              |
|         |                       |                                                       | 30                                                | 50.2                                    | 102.4           | 5.0              |
| LDC-2   | pachymic<br>acid      | 28.4                                                  | 0                                                 | -                                       | -               | -                |
|         |                       |                                                       | 25                                                | 75.8                                    | 82.3            | 2.0              |
|         |                       |                                                       | 50                                                | 88.5                                    | 97.8            | 3.3              |
|         |                       |                                                       | 75                                                | 118.3                                   | 102.5           | 2.5              |
|         | poricoic<br>acid B    | 22.9                                                  | 0                                                 | -                                       | -               | -                |
|         |                       |                                                       | 25                                                | 48.9                                    | 85.3            | 1.9              |
|         |                       |                                                       | 50                                                | 90.7                                    | 92.2            | 2.4              |
|         |                       |                                                       | 75                                                | 101.2                                   | 102.3           | 2.4              |
|         | polyporenic<br>acid C | 10.2                                                  | 0                                                 | -                                       | -               | -                |
|         |                       |                                                       | 10                                                | 25.0                                    | 85.2            | 2.8              |
|         |                       |                                                       | 20                                                | 45.6                                    | 87.5            | 2.6              |
|         |                       |                                                       | 30                                                | 57.5                                    | 95.5            | 3.0              |
| LDG     | pachymic<br>acid      | 27.0                                                  | 0                                                 | -                                       | -               | -                |
|         |                       |                                                       | 10                                                | 28.7                                    | 85.0            | 1.3              |
|         |                       |                                                       | 20                                                | 56.2                                    | 92.8            | 2.0              |
|         |                       |                                                       | 30                                                | 110.6                                   | 103.4           | 0.6              |
|         | poricoic<br>acid B    | 7.5                                                   | 0                                                 | -                                       | -               | -                |

|     |                       |      |     |       |       |     |
|-----|-----------------------|------|-----|-------|-------|-----|
|     | polyporenic<br>acid C | 11.6 | 5   | 7.5   | 80.5  | 1.2 |
|     |                       |      | 10  | 20.5  | 83    | 3.4 |
|     |                       |      | 15  | 38.9  | 85    | 5.8 |
|     |                       |      | 0   | -     | -     | -   |
|     |                       |      | 10  | 10.7  | 83.7  | 5.2 |
|     |                       |      | 20  | 23.6  | 90.2  | 2.0 |
|     |                       |      | 30  | 45.3  | 105.8 | 1.6 |
|     |                       |      | 0   | -     | -     | -   |
|     |                       |      | 50  | 114.3 | 80    | 2.0 |
|     |                       |      | 100 | 239.5 | 95.5  | 1.9 |
| GFC | pachymic<br>acid      | 125  | 150 | 348.3 | 101.2 | 3.6 |
|     |                       |      | 0   | -     | -     | -   |
|     |                       |      | 25  | 48.5  | 82.5  | 3.7 |
|     |                       |      | 50  | 94.2  | 85.4  | 0.8 |
|     |                       |      | 75  | 159.3 | 99.3  | 0.8 |
|     |                       |      | 0   | -     | -     | -   |
|     |                       |      | 50  | 140.3 | 88.6  | 2.8 |
|     |                       |      | 100 | 289.5 | 98.8  | 2.6 |
|     |                       |      | 150 | 350.4 | 102.5 | 3.0 |
|     |                       |      | 0   | -     | -     | -   |
|     | poricoic<br>acid B    | 25   | 25  | 48.5  | 82.5  | 3.7 |
|     |                       |      | 50  | 94.2  | 85.4  | 0.8 |
|     |                       |      | 75  | 159.3 | 99.3  | 0.8 |
|     |                       |      | 0   | -     | -     | -   |
|     |                       |      | 50  | 140.3 | 88.6  | 2.8 |
|     |                       |      | 100 | 289.5 | 98.8  | 2.6 |
|     |                       |      | 150 | 350.4 | 102.5 | 3.0 |
|     |                       |      | 0   | -     | -     | -   |
|     |                       |      | 50  | 140.3 | 88.6  | 2.8 |
|     |                       |      | 100 | 289.5 | 98.8  | 2.6 |

Note: LDC-1/LDC-2 represents different manufacturers.

Table S6 Comparison of TLCSI-MS and HPLC-MS method for analysis of two  
triterpene acids in different batches of *Poria cocos* samples.

| Triterpene acids<br>(mg·g <sup>-1</sup> ) | <i>Poria cocos</i> -12 |         | <i>Poria cocos</i> -20 |         | <i>Poria cocos</i> -22 |         |
|-------------------------------------------|------------------------|---------|------------------------|---------|------------------------|---------|
|                                           | TLCSI-MS               | HPLC-MS | TLCSI-MS               | HPLC-MS | TLCSI-MS               | HPLC-MS |
| Pachymic acid                             | 0.51                   | 0.49    | 0.48                   | 0.45    | 0.41                   | 0.40    |
| Depachymic acid                           | 0.19                   | 0.19    | 0.19                   | 0.20    | 0.32                   | 0.21    |
